# Supplementary material for: Plating versus intramedullary fixation for mid-shaft clavicle fractures: a systemic review and meta-analysis
Source: PeerJ. 2016 Feb 22;4:e1540. doi: 10.7717/peerj.1540 (PMC4768682; doi:10.7717/peerj.1540)
Supplement: Data S1 [file peerj-04-1540-s002.xls]

## Sheet: Sheet1
hospital stays		IF			PF					union rate		IF		PF
study	year	Mean	SD	N	Mean	SD	N			study	year	Event	N	Event	N
Lee YS	2007	6.2	1.25	32	9.1	2.5	30			Lee YS	2007	32	32	29	30
Liu HH	2010	4.6	2.1	51	5.9	2.6	59			Lee YS	2008	56	56	31	32
Assobhi JE	2011	1.4	0.5	19	2.3	0.8	19			S, Thyagarajan D	2009	17	17	16	17
Tarng, YW	2012	3	0.25	25	4	0.25	32			Liu HH	2010	46	51	53	59
Narsaria N	2014	1.4	0.25	33	2.8	0.75	32			Ferran NA	2010	17	17	15	15
										Assobhi JE	2011	19	19	18	19
										Kleweno, CP	2011	18	18	13	14
										Chen, YF	2012	56	57	81	84
blood loss		IF			PF					Fu TH	2012	49	53	49	50
study	year	Mean	SD	N	Mean	SD	N			Tarng, YW	2012	25	25	31	32
Liu HH	2010	67.4	36.7	51	127.9	48.8	59			Wijdicks FJ	2012	43	43	47	47
Tarng, YW	2012	12	1.25	25	77.5	8.75	32			Wenninger JJ	2013	33	33	29	29
Chen, YF	2012	65.1	26.5	57	116.3	42.3	84			Jones, LD	2014	25	25	23	24
Narsaria N	2014	70	15	33	130.8	21	32			Saha P	2014	34	34	36	37
Saha P	2014	47.7	44.7	34	116.5	38.6	37			Narsaria N	2014	32	33	32	32
operative time		IF			PF					major complications		IF		PF
study	year	Mean	SD	N	Mean	SD	N			study	year	Event	N	Event	N
Lee YS 2008	2008	27.5	10.3	56	68.4	19.6	32			Lee YS	2007	0	32	4	30
Liu HH 2010	2010	72.8	26.3	51	75.8	23	59			Lee YS	2008	0	56	3	32
Assobhi JE 2011	2011	44.1	9.1	19	68.1	10.9	19			S, Thyagarajan D	2009	2	17	5	17
Chen, YF 2012	2012	48.3	19.8	57	66.5	22.5	84			Liu HH	2010	0	17	3	15
Tarng, YW 2012	2012	32	2.75	25	65	2.5	32			Ferran NA	2010	12	51	17	59
Narsaria N 2014	2014	40.2	6.75	33	58.4	8	32			Assobhi JE	2011	0	19	3	19
Saha P 2014	2014	51.2	16.2	34	67.8	14.4	37			Kleweno, CP	2011	3	18	1	14
										Chen, YF	2012	0	57	2	84
										Fu TH	2012	4	43	6	47
union time		IF			PF					Tarng, YW	2012	15	25	17	32
study	year	Mean	SD	N	Mean	SD	N			Wijdicks FJ	2012	6	53	14	50
Lee YS	2008	84.8	19.1	56	92.7	21.5	32			Wenninger JJ	2013	1	33	0	29
Liu HH	2010	121.8	42.7	51	117.6	37.1	59			Jones, LD	2014	2	25	3	24
Assobhi JE	2011	156	51	19	219	93	19			Saha P	2014	3	33	8	32
Chen, YF	2012	86.8	29.4	57	100.8	32.9	84			Narsaria N	2014	0	34	5	37
Narsaria N	2014	183	54	33	222	42	32
Saha P	2014	130.9	42	34	154	42	37
										all complications		IF		PF
should score		IF			PF					study	year	Event	N	Event	N
study	year	Mean	SD	N	Mean	SD	N			Lee YS	2007	4	32	16	30
Lee YS	2007	85	8.75	32	84	10	30			Lee YS	2008	4	56	15	32
Lee YS	2008	95.3	4.1	32	93.1	3.8	32			S, Thyagarajan D	2009	3	17	17	17
S, Thyagarajan D	2009	97.8	2.5	17	93.7	4.4	17			Liu HH	2010	4	17	4	15
Ferran NA	2010	92.1	6	17	88.7	9.1	15			Ferran NA	2010	16	51	29	59
Liu HH	2010	86.7	5.3	51	88	4.8	59			Assobhi JE	2011	4	18	10	14
Assobhi JE	2011	95.5	5.3	19	89.9	11.3	19			Kleweno, CP	2011	5	19	3	19
Tarng, YW	2012	96	2	25	92	3.1	32			Chen, YF	2012	27	57	21	84
Narsaria N	2014	94.6	3.2	33	96.2	2.6	32			Fu TH	2012	7	43	28	47
Saha P	2014	92.3	4.8	34	90.7	4.6	37			Tarng, YW	2012	4	25	10	32
										Wijdicks FJ	2012	41	53	34	50
										Wenninger JJ	2013	3	33	7	29
wound size		IF			PF					Jones, LD	2014	13	34	20	37
study	year	Mean	SD	N	Mean	SD	N			Saha P	2014	3	33	12	32
Lee YS	2008	4.1	0.3	56	8.4	1.6	32			Narsaria N	2014	2	25	3	24
Liu HH	2010	11.9	4.4	51	22.3	4.5	59
Assobhi JE	2011	4.3	0.8	19	8.5	1.6	19
Tarng, YW	2012	3	0.3	25	7.5	0.3	32
Fu TH	2012	5.3	0.9	53	8.4	0.5	50
Narsaria N	2014	4.5	0.6	33	10.2	0.9	32
